# Supplementary material for: Efficacy of a Web-Based Guided Recommendation Service for a Curated List of Readily Available Mental Health and Well-Being Mobile Apps for Young People: Randomized Controlled Trial
Source: J Med Internet Res. 2017 May 12;19(5):e141. doi: 10.2196/jmir.6775 (PMC5446666; doi:10.2196/jmir.6775)
Supplement: Multimedia Appendix 2 [file jmir_v19i5e141_app2.pdf]

|                                        | 1 Health and fitness |               |            |                 |              |              | 2 Being independent |               |               |                    |                       |              | 3 Relationships and helping others |             |                       | 4 Thoughts and emotions   |                    |              |               |                |       |               | 5 Dealing with tough times |                       |                   |                |                         |
|----------------------------------------|----------------------|---------------|------------|-----------------|--------------|--------------|---------------------|---------------|---------------|--------------------|-----------------------|--------------|------------------------------------|-------------|-----------------------|---------------------------|--------------------|--------------|---------------|----------------|-------|---------------|----------------------------|-----------------------|-------------------|----------------|-------------------------|
| Apps / Goals                           | Be healthier         | Boost fitness | Drink less | Increase energy | Quit smoking | Sleep better | Achieve balance     | Achieve goals | Better habits | Embrace challenges | Enhance concentration | Learn skills | be kinder                          | help others | improve relationships | improve general wellbeing | increase happiness | manage anger | manage stress | overcome fears | Relax | Stay Positive | Be resilient               | control panic attacks | manage depression | manage anxiety | manage eating disorders |
| 1 Giant Mind                           |                      |               |            |                 |              |              |                     |               |               |                    |                       |              |                                    |             |                       |                           |                    |              | X             |                | X     |               |                            |                       |                   | X              |                         |
| 101 Revolutionary ways to be healthy   | X                    | X             |            |                 |              |              |                     |               |               |                    |                       |              |                                    |             |                       |                           |                    |              |               |                |       |               |                            |                       |                   |                |                         |
| 365 Happy Days                         |                      |               |            |                 |              |              |                     |               |               |                    |                       |              |                                    |             |                       | X                         | X                  |              |               |                |       |               |                            |                       |                   |                |                         |
| 8 glasses a day                        | X                    |               |            |                 |              |              |                     |               |               |                    |                       |              |                                    |             |                       |                           |                    |              |               |                |       |               |                            |                       |                   |                |                         |
| Argus                                  |                      | X             |            |                 |              |              |                     |               |               |                    |                       |              |                                    |             |                       |                           |                    |              |               |                |       |               |                            |                       |                   |                |                         |
| Balanced                               |                      |               |            |                 |              |              |                     | X             |               |                    |                       |              |                                    |             |                       |                           |                    |              |               |                |       |               |                            |                       |                   |                |                         |
| Beat panic                             |                      |               |            |                 |              |              |                     |               |               |                    |                       |              |                                    |             |                       |                           |                    |              |               |                |       |               |                            | X                     |                   |                |                         |
| Behavioural Experiments - CBT          |                      |               |            |                 |              |              |                     |               |               |                    |                       |              |                                    |             |                       |                           |                    |              |               | X              |       |               | X                          |                       |                   |                |                         |
| Bodywise Health and Fitness Tracker    | X                    | X             |            |                 |              |              |                     |               |               |                    |                       |              |                                    |             |                       |                           |                    |              |               |                |       |               | X                          |                       |                   |                |                         |
| Breathe 2 relax                        |                      |               |            |                 |              |              |                     |               |               |                    |                       |              |                                    |             |                       |                           |                    | X            | X             |                |       |               |                            |                       |                   | X              |                         |
| bupa fitness                           |                      | X             |            |                 |              |              |                     |               |               |                    |                       |              |                                    |             |                       |                           |                    |              |               |                |       |               |                            |                       |                   |                |                         |
| Calm meditations and relaxation        |                      |               |            |                 |              | X            |                     |               |               |                    |                       |              |                                    |             |                       |                           |                    |              |               |                | X     |               |                            |                       |                   |                |                         |
| Couch to 5k                            | X                    | X             |            |                 |              |              |                     |               |               |                    |                       |              |                                    |             |                       |                           |                    |              |               |                |       |               |                            |                       |                   |                |                         |
| Dormio                                 |                      |               |            |                 |              | X            |                     |               |               |                    |                       |              |                                    |             |                       |                           |                    |              |               |                |       |               |                            |                       |                   |                |                         |
| eCBT Mood                              |                      |               |            |                 |              |              |                     |               |               |                    |                       |              |                                    |             |                       |                           |                    |              |               |                |       |               |                            | X                     |                   |                |                         |
| Everest                                |                      |               |            |                 |              |              |                     | X             |               |                    |                       |              |                                    |             |                       |                           |                    |              |               |                |       |               |                            |                       |                   |                |                         |
| Goal Setter                            |                      |               |            |                 |              |              |                     | X             |               |                    |                       | X            |                                    |             |                       |                           |                    |              |               |                |       |               |                            |                       |                   |                |                         |
| Good Habit Maker                       |                      |               |            |                 |              |              |                     | X             |               |                    |                       |              |                                    |             |                       | X                         |                    |              |               |                |       |               |                            |                       |                   |                |                         |
| Gratitude Journal Life Changing App    |                      |               |            |                 |              |              |                     |               |               |                    |                       |              |                                    |             | X                     |                           |                    |              |               |                |       | X             |                            |                       |                   |                |                         |
| health tap                             | X                    |               |            |                 |              |              |                     |               |               |                    |                       |              |                                    |             |                       |                           |                    |              |               |                |       |               |                            |                       |                   |                |                         |
| instant heart rate                     |                      | X             |            |                 |              |              |                     |               |               |                    |                       |              |                                    |             |                       |                           |                    |              |               |                |       |               |                            |                       |                   |                |                         |
| Juice                                  | X                    |               |            | X               |              |              |                     |               |               |                    |                       |              |                                    |             |                       |                           |                    |              |               |                |       |               |                            |                       |                   |                |                         |
| Kindness Meditation                    |                      |               |            |                 |              |              |                     |               |               |                    |                       |              | X                                  |             |                       |                           |                    |              |               |                |       | X             |                            |                       |                   |                |                         |
| learn panic CBT                        |                      |               |            |                 |              |              |                     |               |               |                    |                       |              |                                    |             |                       |                           |                    |              |               |                |       |               |                            | X                     |                   |                |                         |
| mindfulness meditation                 |                      |               |            |                 |              |              |                     |               |               |                    |                       |              |                                    |             |                       |                           |                    |              | X             |                |       |               |                            |                       |                   |                |                         |
| Moodkit                                |                      |               |            |                 |              |              |                     |               |               |                    |                       |              |                                    |             |                       |                           |                    |              |               |                |       | X             |                            |                       |                   |                |                         |
| My Calm Beat                           |                      |               |            |                 |              |              |                     |               |               |                    | X                     |              |                                    |             |                       |                           |                    |              | X             |                |       |               |                            |                       |                   |                |                         |
| My quit buddy                          |                      |               |            |                 | X            |              |                     |               |               |                    |                       |              |                                    |             |                       |                           |                    |              | X             |                |       |               | X                          |                       |                   |                |                         |
| Nike running                           |                      | X             |            |                 |              |              |                     |               |               |                    |                       |              |                                    |             |                       |                           |                    |              |               |                |       |               |                            |                       |                   |                |                         |
| Optimism                               |                      |               |            |                 |              |              |                     |               |               |                    |                       |              |                                    |             |                       |                           |                    |              |               |                |       |               |                            |                       | X                 |                |                         |
| Panic attack aid lite                  |                      |               |            |                 |              |              |                     |               |               |                    |                       |              |                                    |             |                       |                           |                    |              |               |                |       |               |                            | X                     |                   |                |                         |
| Pay it forward                         |                      |               |            |                 |              |              |                     |               |               |                    |                       |              | X                                  | X           |                       |                           |                    |              |               |                |       | X             |                            |                       |                   |                |                         |
| Proof                                  |                      |               |            |                 |              |              |                     | X             | X             | X                  |                       |              |                                    |             |                       |                           |                    |              |               |                |       |               |                            |                       |                   |                |                         |
| Relax with Andrew Johnson Lite         |                      |               |            |                 |              |              |                     |               |               |                    |                       |              |                                    |             |                       |                           |                    |              | X             |                |       |               |                            |                       |                   |                |                         |
| Relaxation Techniques - Calm your mind |                      |               |            |                 |              |              |                     |               |               |                    |                       |              |                                    |             |                       |                           |                    |              | X             |                |       |               |                            |                       |                   |                |                         |
| Rise up overcome your eating disorder  |                      |               |            |                 |              |              |                     |               |               |                    |                       |              |                                    |             |                       |                           |                    |              |               |                |       |               |                            |                       |                   |                | X                       |
| Self-Help for Anxiety Management       |                      |               |            |                 |              |              |                     |               |               |                    |                       |              |                                    |             |                       |                           |                    |              | X             |                |       |               |                            |                       |                   | X              |                         |
| Smiling Mind                           |                      |               |            |                 |              |              |                     |               |               |                    |                       |              |                                    |             |                       | X                         |                    |              | X             |                | X     | X             |                            |                       |                   |                |                         |
| Smoke free                             |                      |               |            |                 | X            |              |                     |               |               |                    |                       |              |                                    |             |                       |                           |                    |              |               |                |       |               |                            |                       |                   |                |                         |
| Spire                                  |                      |               |            |                 |              |              |                     | X             |               |                    |                       |              |                                    |             |                       |                           |                    |              |               |                |       |               |                            |                       |                   |                |                         |
| Stop panic and anxiety                 |                      |               |            |                 |              |              |                     |               |               |                    |                       |              |                                    |             |                       |                           |                    |              |               |                |       |               |                            | X                     |                   | X              |                         |
| super better                           |                      |               |            |                 |              |              |                     |               |               |                    |                       |              |                                    |             |                       |                           |                    |              |               |                |       | X             | X                          |                       |                   |                |                         |
| Talking anxiety                        |                      |               |            |                 |              |              |                     |               |               |                    |                       |              |                                    |             |                       |                           |                    |              |               |                |       |               |                            |                       |                   | X              |                         |
| The sorter                             |                      |               |            |                 |              |              |                     | X             |               |                    |                       |              |                                    |             |                       |                           |                    |              |               |                |       |               |                            |                       |                   |                |                         |
| Walk Watch Lite                        | X                    | X             |            |                 |              |              |                     |               |               |                    |                       |              |                                    |             |                       |                           |                    |              |               |                |       |               |                            |                       |                   |                |                         |
| WebMD                                  |                      |               |            |                 |              |              |                     |               |               |                    |                       |              |                                    |             |                       | X                         |                    |              |               |                |       |               |                            |                       |                   |                |                         |
